# Supplementary material for: Metabolite identification and pharmacokinetic study of Lamiophlomis rotata in rats
Source: Royal Society of Chemistry journal article supplement (doi:10.1039/c5ra25264d), 2016-01-01
Supplement: c5ra25264d1.pdf [file c5ra25264d1.pdf]

## Electronic Supplementary Information

### Metabolites identification and pharmacokinetic study of *Lamiophlomis rotata* in rats

Feng Zhang,<sup>a</sup> Mingping La,<sup>†a</sup> Xiaobin Gong,<sup>a</sup> Shouhong Gao,<sup>a</sup> Zhijun Wu,<sup>a</sup> Lianna Sun,<sup>b</sup> Xia Tao<sup>a</sup> and Wansheng Chen<sup>a,\*</sup>

<sup>a</sup> *Department of Pharmacy, Changzheng Hospital, Second Military Medical University, 415 Fengyang Road, Shanghai 200003, P. R. China*

<sup>b</sup> *Department of Identification of traditional chinese medicine, School of Pharmacy, Second Military Medical University, 325 Guohe Road, Shanghai 200433, P. R. China*

#### CORRESPONDENCE:

chenwansheng@smmu.edu.cn, chenwanshengsmmu@aliyun.com

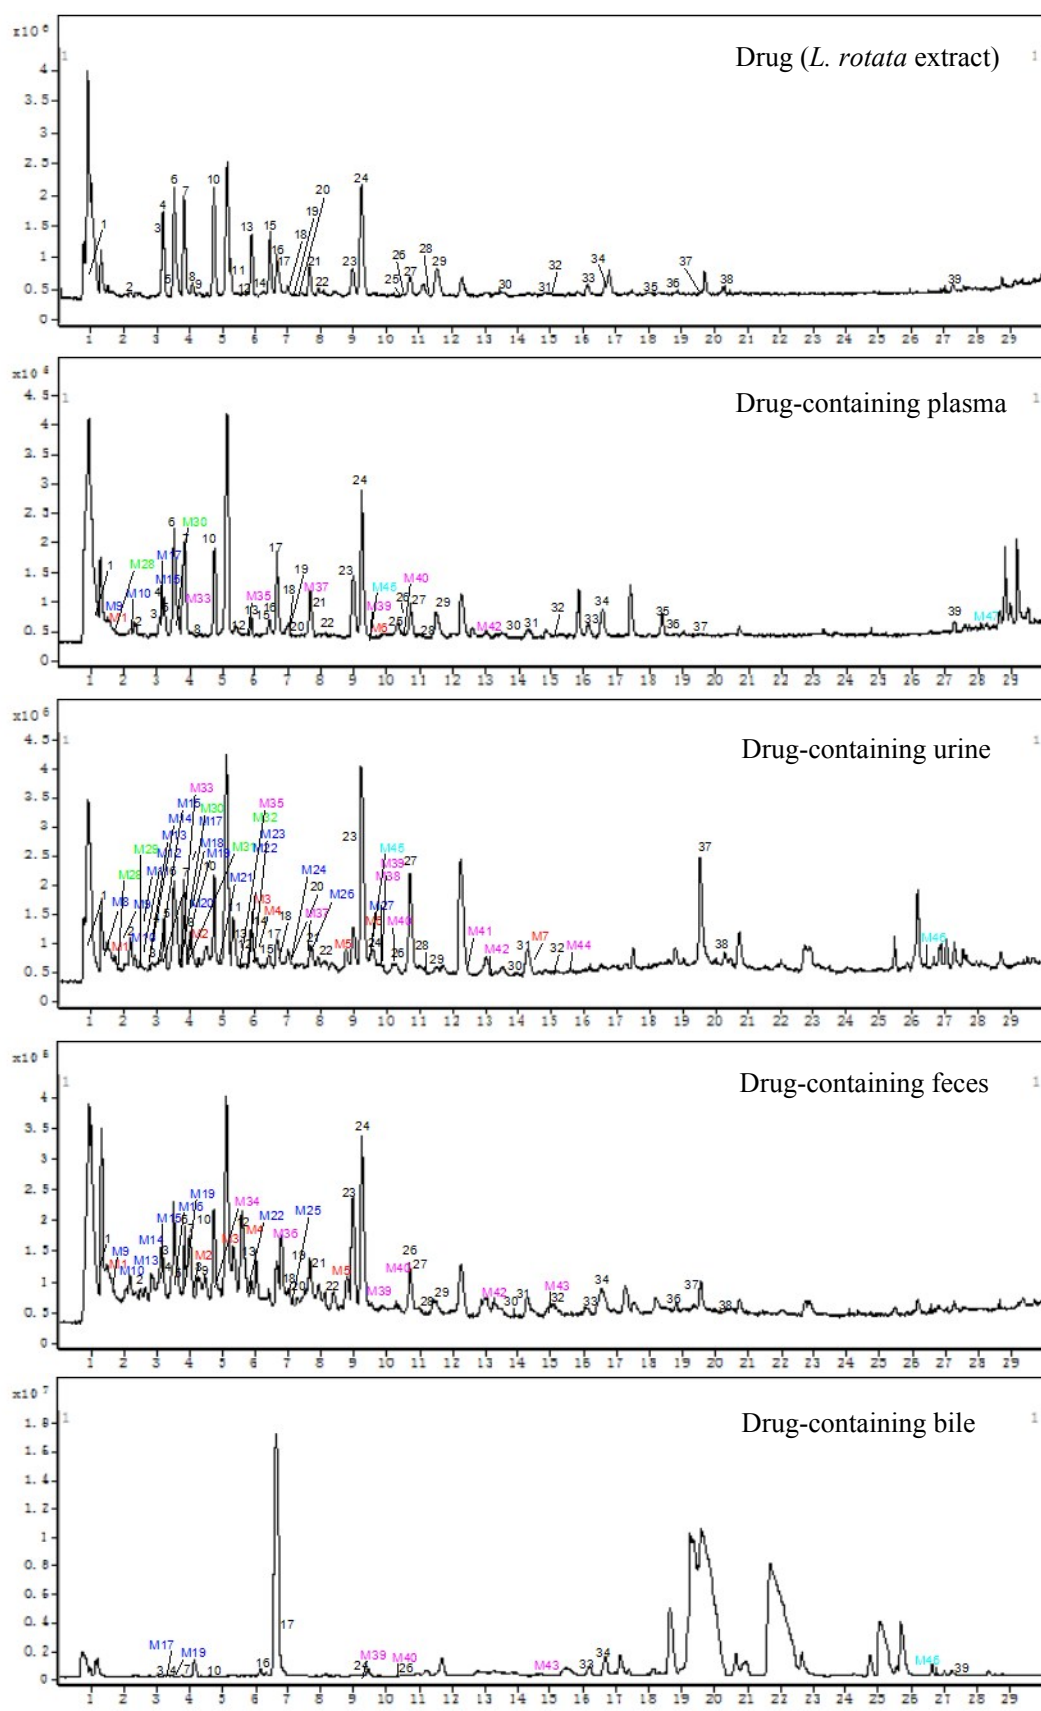

**Fi**

**g. S1.** TIC of *L. rotata* extract and metabolic fingerprints of biological samples after oral administration of *L. rotata* extract in negative mode.

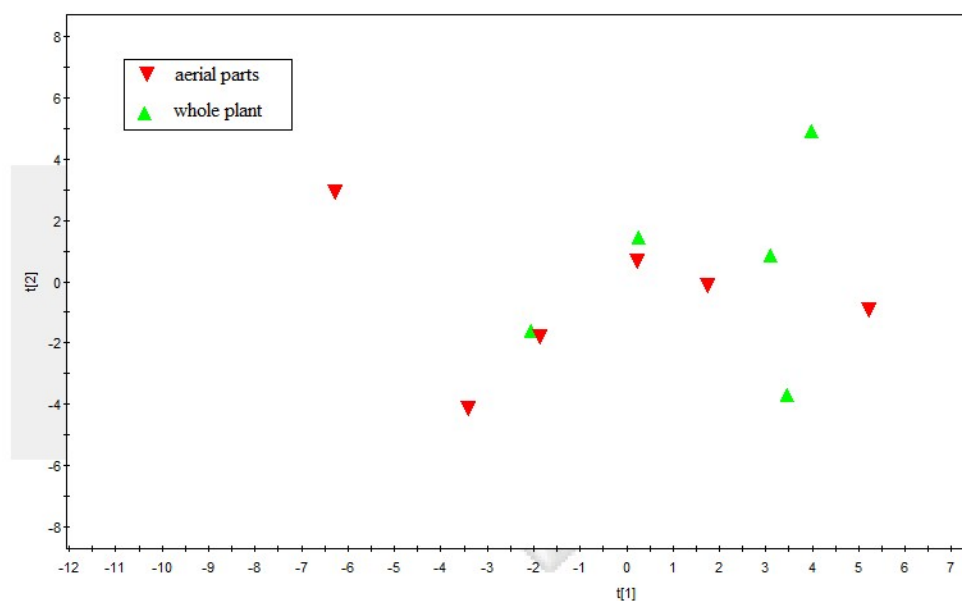

**Fig. S2.** Partial least squares analysis for fingerprint chromatograms of drug-containing plasma of two groups' rats after oral administration of the aerial parts and the whole plant of *L. rotata*.

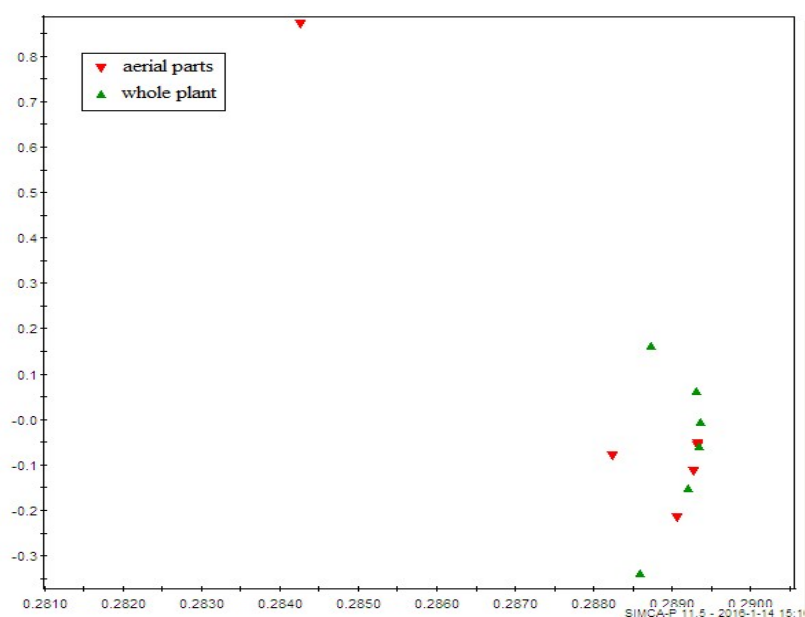

**Fig. S3.** Partial least squares analysis for fingerprint chromatograms of in vivo metabolites in drug-containing plasma of two groups' rats after oral administration of the aerial parts and the whole plant of *L. rotata*.

Table S1 Identification of the prototype constituents from *L. rotata* in biological samples by UPLC/Q-TOF-MS

| Peak no. | RT (min) | Formula                                           | Selected ion          | Identification                                                   | Class | Source |   |   |   |
|----------|----------|---------------------------------------------------|-----------------------|------------------------------------------------------------------|-------|--------|---|---|---|
|          |          |                                                   |                       |                                                                  |       | P      | U | F | B |
| 1        | 0.908    | C <sub>12</sub> H <sub>22</sub> O <sub>11</sub>   | [M+H] <sup>+</sup>    | 2-D-glucopyranoside-(2→1)-2-D-glucopyranoside                    | G     | √      | √ | √ |   |
| 2        | 2.183    | C <sub>17</sub> H <sub>26</sub> O <sub>13</sub>   | [M+HCOO] <sup>-</sup> | phlomiol                                                         | I     | √      | √ | √ |   |
| 3        | 3.116    | C <sub>17</sub> H <sub>24</sub> O <sub>11</sub>   | [M+HCOO] <sup>-</sup> | phlorigidoside C                                                 | I     | √      | √ | √ | √ |
| 4        | 3.205    | C <sub>17</sub> H <sub>26</sub> O <sub>12</sub>   | [M+HCOO] <sup>-</sup> | lamalbid                                                         | I     | √      | √ | √ | √ |
| 5        | 3.590    | C <sub>20</sub> H <sub>30</sub> O <sub>12</sub>   | [M-H] <sup>-</sup>    | decaffeoylverbascoside                                           | I     | √      | √ | √ |   |
| 6        | 3.631    | C <sub>17</sub> H <sub>26</sub> O <sub>11</sub>   | [M+HCOO] <sup>-</sup> | shanzhiside methyl ester                                         | I     | √      | √ | √ |   |
| 7        | 3.843    | C <sub>17</sub> H <sub>24</sub> O <sub>12</sub>   | [M+H] <sup>+</sup>    | sesamoside                                                       | I     | √      | √ | √ | √ |
| 8        | 4.089    | C <sub>21</sub> H <sub>28</sub> O <sub>13</sub>   | [M-H] <sup>-</sup>    | cistanoside F                                                    | PG    | √      | √ | √ |   |
| 9        | 4.540    | C <sub>7</sub> H <sub>6</sub> O <sub>3</sub>      | [M-H] <sup>-</sup>    | 4-hydroxybenzoic acid                                            | P     |        |   | √ |   |
| 10       | 4.752    | C <sub>17</sub> H <sub>26</sub> O <sub>11</sub>   | [M+HCOO] <sup>-</sup> | 5-hydroxyloganin                                                 | I     | √      | √ | √ | √ |
| 11       | 5.603    | C <sub>10</sub> H <sub>20</sub> O <sub>6</sub>    | [M+HCOO] <sup>-</sup> | (2R,5R)-2-butoxy-2,5-bis(hydroxymethyl) tetrahydrofuran-3,4-diol | G     |        | √ |   |   |
| 12       | 5.661    | C <sub>14</sub> H <sub>20</sub> O <sub>8</sub>    | [M-H] <sup>-</sup>    | vanillyl-β-D-glucopyranside                                      | G     | √      | √ | √ |   |
| 13       | 5.847    | C <sub>19</sub> H <sub>28</sub> O <sub>12</sub>   | [M+HCOO] <sup>-</sup> | 6-O-acetylshanzhiside methyl ester                               | I     | √      | √ | √ |   |
| 14       | 6.207    | C <sub>21</sub> H <sub>32</sub> O <sub>12</sub>   | [M+HCOO] <sup>-</sup> | cistanoside E                                                    | PG    |        | √ |   |   |
| 15*      | 6.306    | C <sub>7</sub> H <sub>6</sub> O <sub>3</sub>      | [M+H] <sup>+</sup>    | 3,4-dihydroxybenzaldehyde                                        | P     | √      | √ |   |   |
| 16*      | 6.457    | C <sub>17</sub> H <sub>24</sub> O <sub>11</sub>   | [M+HCOO] <sup>-</sup> | 7,8-dehydropenstemoside                                          | I     | √      |   |   | √ |
| 17       | 6.633    | C <sub>17</sub> H <sub>24</sub> O <sub>10</sub>   | [M+HCOO] <sup>-</sup> | 7,8-dehydropenstemonoside                                        | I     | √      | √ |   | √ |
| 18       | 6.698    | C <sub>17</sub> H <sub>25</sub> ClO <sub>11</sub> | [M+H] <sup>+</sup>    | chlorotuberoside                                                 | I     | √      | √ | √ |   |
| 19*      | 6.986    | C <sub>17</sub> H <sub>26</sub> O <sub>10</sub>   | [M+HCOO] <sup>-</sup> | 7-epi-loganin                                                    | I     | √      |   | √ |   |
| 20*      | 7.018    | C <sub>17</sub> H <sub>24</sub> O <sub>10</sub>   | [M+H] <sup>+</sup>    | 7-dehydroxy-zaluzioside                                          | I     | √      | √ | √ |   |
| 21       | 7.672    | C <sub>17</sub> H <sub>26</sub> O <sub>10</sub>   | [M+H] <sup>+</sup>    | loganin                                                          | I     | √      | √ | √ |   |
| 22       | 8.056    | C <sub>29</sub> H <sub>36</sub> O <sub>16</sub>   | [M-H] <sup>-</sup>    | campneoside II                                                   | PG    | √      | √ | √ |   |
| 23       | 9.008    | C <sub>16</sub> H <sub>28</sub> O <sub>7</sub>    | [M+HCOO] <sup>-</sup> | (2Z)-2,6-dimethyl-6-hydroxyocta-2,7-dienyl-O-b-D-glucopyranoside | G     | √      | √ | √ |   |
| 24       | 9.250    | C <sub>19</sub> H <sub>28</sub> O <sub>12</sub>   | [M+HCOO] <sup>-</sup> | 8-O-acetylshanzhiside methyl ester (barlerin)                    | I     | √      | √ | √ | √ |
| 25       | 10.652   | C <sub>22</sub> H <sub>14</sub> O <sub>7</sub>    | [M+HCOO] <sup>-</sup> | 4'-(p-carbonylphenyl)-luteolin                                   | F     | √      |   |   |   |
| 26       | 10.657   | C <sub>26</sub> H <sub>28</sub> O <sub>15</sub>   | [M-H] <sup>-</sup>    | luteolin-7-O-β-D-apiofuranosyl (1→6)-β-D-glucopyranoside         | F     | √      | √ | √ | √ |
| 27       | 10.755   | C <sub>34</sub> H <sub>44</sub> O <sub>19</sub>   | [M-H] <sup>-</sup>    | forsythoside B                                                   | PG    | √      | √ | √ |   |
| 28       | 11.141   | C <sub>30</sub> H <sub>38</sub> O <sub>16</sub>   | [M-H] <sup>-</sup>    | betonyoside A                                                    | PG    | √      | √ | √ |   |
| 29       | 11.581   | C <sub>21</sub> H <sub>20</sub> O <sub>11</sub>   | [M+H] <sup>+</sup>    | luteolin-7-β-D-glucopyranside                                    | F     | √      | √ | √ |   |
| 30*      | 13.986   | C <sub>26</sub> H <sub>28</sub> O <sub>14</sub>   | [M-H] <sup>-</sup>    | apigenin 7-O-β-D-apiofuranosyl (1→6)-β-D-glucopyranoside         | F     | √      | √ | √ |   |
| 31       | 14.256   | C <sub>29</sub> H <sub>36</sub> O <sub>15</sub>   | [M-H] <sup>-</sup>    | verbascoside                                                     | PG    | √      | √ | √ |   |
| 32       | 15.05    | C <sub>21</sub> H <sub>20</sub> O <sub>10</sub>   | [M+H] <sup>+</sup>    | apigenin-7-O-β-D-glucopyranoside                                 | F     | √      | √ | √ |   |
| 33       | 16.143   | C <sub>23</sub> H <sub>22</sub> O <sub>12</sub>   | [M-H] <sup>-</sup>    | eugenyl-β-D-glucopyranoside                                      | F     | √      |   | √ | √ |

|     |        |                                                 |                       |                                         |   |   |   |   |
|-----|--------|-------------------------------------------------|-----------------------|-----------------------------------------|---|---|---|---|
| 34  | 16.681 | C <sub>17</sub> H <sub>26</sub> O <sub>9</sub>  | [M+H] <sup>+</sup>    | 8-epi-7-deoxyloganin                    | I | √ | √ | √ |
| 35  | 18.340 | C <sub>15</sub> H <sub>10</sub> O <sub>5</sub>  | [M-H] <sup>-</sup>    | salviifoside A                          | F | √ |   |   |
| 36* | 18.808 | C <sub>21</sub> H <sub>32</sub> O <sub>10</sub> | [M+H] <sup>+</sup>    | 6β-n-butoxy-7,8-dehydrostenemonoside    | I | √ | √ |   |
| 37  | 19.617 | C <sub>15</sub> H <sub>10</sub> O <sub>6</sub>  | [M+H] <sup>+</sup>    | luteolin                                | F | √ | √ | √ |
| 38  | 20.156 | C <sub>16</sub> H <sub>28</sub> O <sub>6</sub>  | [M+HCOO] <sup>-</sup> | (+/-)-α-terpineol-β-D-O-glucopyranoside | G |   | √ | √ |
| 39* | 27.576 | C <sub>29</sub> H <sub>46</sub> O <sub>4</sub>  | [M+H] <sup>+</sup>    | notohamosin B                           | N | √ |   | √ |

I – iridoids, F – flavanoids, PG – phenylethanoid glycosides, N – nortriterpenoid, P – phenolic compounds and G – glycoside compounds;

P-plasma, U-urine, F-feces and B-bile.

\* Means that compounds were tentatively identified by the MS spectra by lack of reference compounds.

Table S2 Regression data and LLOQs of the six analytes.

| Compound                              | Regression equation  | Correlation coefficient ( <i>r</i> ) | LLOQ (ng/mL) |
|---------------------------------------|----------------------|--------------------------------------|--------------|
| acetylshanzhiside<br>methyl ester     | $y=69.2471x-0.0236$  | 0.9936                               | 4.00         |
| 8-O-acetylshanzhiside<br>methyl ester | $y=10.2167x-0.0045$  | 0.9963                               | 4.00         |
| lamalbid                              | $y=98.5013x-0.0087$  | 0.9958                               | 1.00         |
| verbascoside                          | $y=334.0191x+0.0146$ | 0.9955                               | 4.00         |
| forsythoside B                        | $y=55.2983x+0.0794$  | 0.9963                               | 3.50         |
| luteolin-7-O-β-D<br>-glucopyranoside  | $y=139.0578x-0.0978$ | 0.9952                               | 0.40         |
